# 1 **High-throughput screening of high protein producer budding yeast** 2 **using gel microdrop technology**

3

4 Hirotsugu Fujitani<sup>1</sup>, Soichiro Tsuda<sup>2</sup>, Tomoko Ishii<sup>3</sup>, Masayuki Machida<sup>3,\*</sup>

5

6 <sup>1</sup> Biomedical Research Institute, National Institute of Advanced Industrial Science and  
7 Technology (AIST), Ibaraki, Japan

8 <sup>2</sup> On-chip Biotechnologies, Tokyo, Japan

9 <sup>3</sup> Genome Biotechnology Laboratory, Kanazawa Institute of Technology, Ishikawa, Japan

10

11 \* **Corresponding author:** Masayuki Machida [m.machida@neptune.kanazawa-it.ac.jp](mailto:m.machida@neptune.kanazawa-it.ac.jp)

12

## 13 **Abstract**

14 The need for protein production has been growing over the years in various industries. We here  
15 present a high-throughput screening strategy to isolate high producer budding yeast clones from  
16 a mutagenized cell population using gel microdrop (GMD) technology. We use a microfluidic  
17 water-in-oil (W/O) emulsion method to produce monodisperse GMDs and a microfluidic cell  
18 sorter for damage-free sorting of GMDs by fluorescently quantifying secreted proteins. As a result,  
19 this high-throughput GMD screening method effectively selects high producer clones and  
20 improves protein production up to five-fold. We speculate that this screening strategy can be  
21 applied, in principle, to select any types of high producer cells (bacterial, fungal, mammalian,  
22 etc.) which produce arbitrary target protein as it does not depend on enzymes to be produced.

23

24

## 25 **Introduction**

26 The need for protein production has been growing in recent years, owing to the rapid advancement  
27 of biopharmaceuticals such as therapeutic antibodies (1). Industrial enzymes have been a major  
28 use of protein production, widely used in various industries, such as food, fuel, and  
29 pharmaceutical industries. As this need is expected to increase further (2), more efficient protein  
30 production is required to cope with the growing need.

31 Microbes have been serving as a workhorse for protein production for a long time because of ease  
32 of genetic engineering and the fast growth. It is, however, well recognized that a microbial  
33 population in general shows metabolic heterogeneity, in which individual cells show different  
34 protein expression levels due to transcriptional noise (3). Thus, selection of high producing  
35 subpopulation is a crucial problem when producing proteins more efficiently at the industrial scale  
36 (4).

37 A number of selection methods have been developed so far. The most widely used (thus  
38 conventional) technique is the limiting dilution method, where cell population is diluted in well  
39 plates until single cells are isolated in individual wells, followed by subsequent protein  
40 quantification assays, such as enzyme-linked immunosorbent assay (ELISA). This traditional  
41 method is labor-intensive, time-consuming and low-throughput, thus alternative high-throughput  
42 screening (HTS) methods have been actively sought after.

43  
44 Florescent-activated cell sorter (FACS) is an alternative HTS method for isolation of high-  
45 producing cells (5,6). For example, high producer cells were isolated by FACS based on  
46 fluorescent intensity of green fluorescent protein (GFP), co-transfected with a target protein (7).  
47 However, there is a general trade-off between the protein productivity and growth rate due to  
48 metabolic burden imposed by heterologous protein production.

49 One of the alternative HTS methods that circumvents the trade-off issue is a gel microdrop (GMD)  
50 method (9). Individual cells are encapsulated into agar GMDs and cultured to form colonies and  
51 secrete target proteins within. The proteins are confined in the GMDs due to limited diffusion of  
52 molecules or by cross-linking to gel materials (e.g., by avidin-biotin interaction) (6). Captured  
53 proteins are fluorescently labelled in order to link protein production and fluorescence intensity.  
54 This method prevents users from selecting high-producing but slow-growing cells because the  
55 production level is assessed by the total amount of target protein secreted by a group of producer  
56 cells.

57

58 In this paper, we set out to address two issues pertaining to GMD-based screening method. First,  
59 the conventional method for producing GMDs create polydisperse GMDs ranging from tens of  
60 microns to sub-millimeter in diameter. Larger GMDs need to be filtered out to avoid GMDs  
61 clogging inside FACS. This means some portion of whole yeast population contained in the large  
62 GMDs will be lost at this step, which effectively decrease the size of entire yeast population to be  
63 screened. Plus, the method requires a large volume to produce GMDs at a time (typically 10 mL),  
64 which is costly and hence makes it difficult to test various experimental conditions. We overcome  
65 these issues by creating monodisperse GMDs using microfluidic droplet generator  
66 (Supplementary Fig. 1). This method typically requires tens of hundred microliters and uniform-  
67 size GMDs eliminates the need of filtering prior to sorting.

68 Second, cells sorted by cell sorters can die or show little growth after sorting because of sorting-  
69 induced cellular stress (8,10,11), which is also the case with GMD-based cell sorting. To improve  
70 the viability of sorted cells, we employed a microfluidics-based cell sorter, which cause much less  
71 damage or stress to the cell, and hence show better viability.

72 By combining these two features, we show that GMD-based yeast screening improves the protein

73 yield up to five-fold compared to the original strain only in one round of screening.

74

75

76

## 77 **Materials and Methods**

### 78 *Construction and cultivation of luciferase-producing budding yeast BY4741 strain*

79 A plasmid used in this research (Figure 1B) was prepared by combining the vector DNA and the  
80 fragments amplified by PCR using Gibson Assembly (New England BioLabs). The vector  
81 harbored the *URA3* and the *leu2-d* markers and the 2-m replication origin derived from the pYEX-  
82 S1 (Clontech) backbone. The protein expression cassette consisted of the *GALI* promoter,  
83 secretory luciferase and the *CYCI* terminator. The prepro-alpha-factor leader peptide of *S.*  
84 *cerevisiae* was fused to *Metridia longa* luciferase derived from pMetLucReporter (Clontech) after  
85 removal of its original signal peptide and was further fused to Halo-tag derived from HaloTag  
86 Control Vector (Promega) at the C-terminus. The FLAG and the Hisx6-HA tags were introduced  
87 directly at the downstream of the prepro-alpha-factor leader peptide and the luciferase,  
88 respectively. Transformation of yeast BY4741 strain was conducted according to a standard  
89 protocol of *S. cerevisiae* Direct Transformation Kit *Wako* (Fujifilm Wako Chemical, Osaka,  
90 Japan).

91 The transformant was grown in the medium containing 0.67% Yeast Nitrogen Base w/o Amino  
92 Acid (DIFCO) supplemented with –Ura DO Supplement, 100 mM sodium phosphate (pH 7.0)  
93 and 2% carbon source (glucose or galactose as indicated in the text).

94

### 95 *UV mutagenesis of budding yeast BY4741 strain*

96 The transformed BY4741 stain was exposed to UV light to introduce random mutagenesis in the

97 genome to screen high producer mutants using cell sorter. To do this, the yeast cells grown on  
98 SD-ura medium containing glucose were first diluted to  $1.0 \times 10^6$  cells  $\text{mL}^{-1}$  with SD-ura medium  
99 containing galactose, then pipetted on a sterile plastic surface ( $10 \mu\text{L} \times 30$  spots). They were  
100 irradiated by UV light for 0 to 120 seconds. After UV exposure, the yeast suspensions were  
101 collected in a tube for GMD encapsulation.

102

### 103 *Microfluidic generation and cultivation of GMDs*

104 Mutagenized yeast suspension was mixed with 2.5% molten low-melting point agarose gel at 4:1  
105 volume ratio. The suspension-agar mixture was loaded into a sample well of a DG800 cartridge  
106 (On-chip Biotechnologies, Tokyo, Japan) to generate water-in-oil (W/O) emulsion using On-chip  
107 droplet generator (On-chip Biotechnologies, Tokyo, Japan). Two percent 008-FluoroSurfactant in  
108 HFE 7500 (RAN Biotechnologies, USA) was used as the continuous oil phase. The pressures of  
109 cell suspension and oil were maintained at 30 kPa and 20 kPa, respectively, to keep the size of  
110 generate W/O emulsion around 50-60  $\mu\text{m}$ . The whole droplet generator unit was kept in a  
111 temperature control unit at  $37^\circ\text{C}$  to prevent the agarose from solidifying and form stable-size  
112 droplets. Three hundred microliter of the yeast suspension was encapsulated into the emulsion for  
113 each sample. The W/O emulsion was kept on ice for at least 30 min to make GMDs by solidifying  
114 the agarose gel. The oil phase with the fluorinated surfactant was removed by adding 10%  
115 1H,1H,2H,2H-Perfluoro-1-octanol (Sigma-Aldrich) in HFE 7500 (14) and GMDs were  
116 suspended in SD-ura medium containing galactose.

117 GMDs containing yeast cells were cultivated with a shaking incubator at  $30^\circ\text{C}$  and overnight .

118

### 119 *Fluorescence staining of GMDs*

120 To stain proteins secreted from cells within GMDs, Halo Tag Alexa Fluor 488 Ligand (Promega)

121 was diluted with moderate amount of PBS. The diluted Halo tag ligand were mixed with  
122 cultivated GMDs at room temperature and further incubated for 30 min. After washing three times  
123 with PBS, the stained GMDs were observed with fluorescence microscope.

124

#### 125 *Sorting and microscopic observation of GMDs*

126 Sorting of GMDs containing high protein producer yeasts was performed using On-chip Sort (On-  
127 chip Biotechnologies, Tokyo, Japan). On-chip Sort employs a microfluidics-based sorting  
128 mechanism with disposable microfluidic chip (Supplementary Figure 2). Eighty micron channel  
129 width disposable sorting chip (Z101, On-chip Biotechnologies) was used for cell sorting with On-  
130 chip T buffer as sheath liquid. The sample was flown through a microfluidic channel at  
131 approximately 300-500 events per second and in total 200-500 target GMDs were sorted. After  
132 sorting, collected GMDs containing yeast were observed using differential interference contrast  
133 and fluorescent microscope (BX3-URA, Olympus, Tokyo, Japan) for morphological analysis of  
134 yeasts.

135

#### 136 *Luciferase assay of sorted cells*

137 Sorted GMDs were streaked onto agar plates containing the SD-ura medium with galactose for  
138 further cultivation and colony formation. Each colony was picked and suspended into 2 ml of SD-  
139 ura medium containing galactose at pH7.0. The suspensions were incubated with shaking at 30°C,  
140 150 rpm for 24 hours. The supernatant was retrieved and applied to luciferase assay. The  
141 luciferase assay was conducted according to a standard protocol of Ready-To-Grow Dual Secreted  
142 Reporter Assay (Clontech Laboratories, Inc., US) except that the amount of substrate was reduced  
143 to half of the defined amount.

144

145

## 146 **Results**

### 147 *Workflow of high-throughput GMD screening for high producer mutant cells*

148 First, we describe a workflow of our screening method for high protein producer cells using GMD  
149 and cell sorter (Fig. 1A): A plasmid with mLuc gene and *gal1* promoter (Fig. 1B) were  
150 transformed into yeast cells and mutagenized by UV exposure. The mutant yeast cells were  
151 diluted to  $\sim 1 \times 10^6$  cells/mL and encapsulated in agarose gel using microfluidic droplet generator  
152 so that most likely only one cell would be embedded in one GMD (i.e., Poisson parameter  $\lambda=0.1$ ).  
153 GMDs including mutant cells were incubated overnight and then luciferase secreted in the GMDs  
154 were stained by HaloTag Alexa Fluor 488 ligand. GMDs with strong fluorescence were sorted by  
155 a microfluidics-based cell sorter because strong fluorescence indicates more protein production  
156 and secretion. Sorted GMDs were cultured on agar plates to form colonies. Each colony was  
157 picked up and sub-cultured with nutrient medium for luciferase assay.

158

### 159 *Comparison of GMD size formed by different GMD formation methods*

160 Prior to sorting of GMDs, we investigated the effect of different formation methods on the size  
161 of GMDs. Figure 1C shows dot plots and microscope images of GMDs containing yeast cells  
162 grown overnight. The dot plots show forward scatter (FSC) and side scatter (SSC) obtained by  
163 the microfluidic cell sorter, which represents the size and the internal complexity of samples,  
164 respectively. GMDs formed by a conventional membrane filtration method (16) show a wide  
165 distribution of points in the dot plot (Fig. 1C upper left) whereas those by the microfluidic droplet  
166 generator did much narrower distribution (Fig. 1C lower left). This indicates the latter samples  
167 are uniform in terms of size and internal structure, compared to the former ones. Indeed,  
168 microscopic images confirm this observation: The size of GMDs made by the microfluidic

169 method was monodisperse, while the one by the conventional method varied even after filtration  
170 by a 70  $\mu\text{m}$  cell strainer. Furthermore, the microfluidic method does not require filtration and thus  
171 the whole GMDs generated can be used for screening.

172

### 173 *Sorting of GMD and Sorting*

174 The mutagenized yeast population encapsulated in GMDs was grown overnight at 30°C 150 rpm,  
175 then applied to microfluidic cell sorter, On-chip Sort. The amount of produced proteins was  
176 quantified by fluorescent ligand (HaloTag Alexa Fluor 488 ligand) covalently bound to HaloTag  
177 conjugated to mLuc. The fluorescent ligand is expected to label proteins secreted out of cells  
178 because it is a cell membrane impermeable compound. We primarily focused on FL2 (detection  
179 wavelength: around 575 nm) and FL3 (detection wavelength: around 620 nm) fluorescence  
180 channels on On-chip Sort because of the fluorescent ligand. The dot plot of FL2 against FL3  
181 fluorescence typically showed a distribution with two long tails expanding towards upper right  
182 (Fig. 2A). From microscope image analyses of sorted samples, we found that the upper tail  
183 consisted of small contaminants (e.g. small fibers or plastic pieces with autofluorescence). In  
184 contrast, the lower tail consisted of GMDs containing budding yeast cells. We found that small  
185 colonies were typically formed within GMDs (Fig. 2B and C). We split the long tail into three  
186 segments, named as P7, P8, and P9, based on the fluorescence intensity of FL2 channel. In P7,  
187 we found that some of the sorted samples showed strong fluorescence despite the colony size (Fig.  
188 2B red circle). Considering that they were small in size or did not form any colonies, we  
189 speculated that they were dead cells. They can be false positive samples because a mass of mLuc  
190 proteins released out of the loose cell wall were stained by fluorescent HaloTag ligand. On the  
191 other hand, GMDs sorted from the P8 segment were observed to show moderate fluorescence  
192 with growing colonies found within GMDs (Fig. 2C). GMDs from P9 segment also contained



193 similar colonies, but with less fluorescence. For these reasons, we decided to sort samples from  
194 P8 segment. Typically, around 1000 samples in one experiment were sorted with P8 gate and  
195 cultured for further analysis.

196

#### 197 *Luciferase assay*

198 GMDs sorted from P8 segment were sub-cultured on agar plates containing the SD-ura medium  
199 at 30°C for at least four days until colonies were visible. Colonies on the plates were individually  
200 transferred 96 well plates with liquid SD-ura medium with galactose and cultured overnight. The  
201 supernatant of total 14 sorted samples as well as the original strain was applied to luciferase assay.  
202 A half of all sorted samples indicated higher protein producing activity than the original strain, of  
203 which one sample (sample P8-7) showed more than twice activity and another sample (sample  
204 P8-12) was five-fold higher (Fig. 3).

205

#### 206 **Discussion and conclusion**

207 We have shown that, as a proof-of-concept, our GMD method effectively selects high producer  
208 clones and improves protein production up to five-fold from only one round of selection. This  
209 work combines microfluidic GMD generation and flow cytometry for HTS. Similar work using  
210 microfluidics and GMD has been done in recent years, such as selection of oil-producing  
211 microalgae (12) and directed evolution of xylanase-producing yeast (13). As our selection strategy  
212 does not depend on enzymes to be produced, in principle it can be applied to select any types of  
213 high producer cells (bacterial, fungal, mammalian, etc.) which produce arbitrary target protein.  
214 We also speculate that the strategy can be applied to the selection of high producer non-model  
215 organisms for which genetic engineering cannot be used. This can be possible, for example, by  
216 labelling target proteins by fluorophore-conjugated antibody or by linking the activity of secreted

217 enzymes with signal intensity using fluorescent probes based on Förster resonance energy transfer  
218 (FRET) . We foresee a wide range of applications for selecting high producer cells, as this method  
219 is capable of sorting not just microbes, but also mammalian cells which are relatively prone to  
220 damage or stress by cell sorting.

221

222

### 223 **Acknowledgement**

224 This work was supported by Kanazawa Institute of Technology (M.M.) and Leading Initiative for  
225 Excellent Young Researchers (LEADER) program (S.T.).

226

### 227 **References**

- 228 1. **Kunert, R. and Reinhart, D.:** : Advances in recombinant antibody manufacturing.  
229 Appl. Microbiol. Biotechnol., **100**, 3451–61 (2016).
- 230 2. **Ecker, D.M., Jones, S.D., and Levine, H.L.:** : The therapeutic monoclonal antibody  
231 market. MAbs, **7**, 9–14 (2015).
- 232 3. **Raser, J.M. and O’Shea, E.K.:** : Molecular biology - noise in gene expression: origins,  
233 consequences, and control. Science (80-. ), **309**, 2010–2013 (2005).
- 234 4. **Rugbjerg, P. and Sommer, M.O.A.:** : Overcoming genetic heterogeneity in industrial  
235 fermentations. Nat. Biotechnol., (2019).
- 236 5. **Carroll, S. and Al-Rubeai, M.:** : The selection of high-producing cell lines using flow  
237 cytometry and cell sorting. Expert Opin. Biol. Ther., **4**, 1821–1829 (2004).
- 238 6. **Browne, S.M. and Al-Rubeai, M.:** : Selection methods for high-producing mammalian  
239 cell lines. Trends Biotechnol., **25**, 425–432 (2007).
- 240 7. **DeMaria, C.T., Cairns, V., Schwarz, C., Zhang, J., Guerin, M., Zuena, E., Estes, S.,**

- 241           **and Karey, K.P.:** : Accelerated clone selection for recombinant cho cells using a facs-  
242           based high-throughput screen. *Biotechnol. Prog.*, **23**, 465–472 (2007).
- 243    8.    **Varma, S., Fendyur, A., Box, A., and Voldman, J.:** : Multiplexed cell-based sensors  
244           for assessing the impact of engineered systems and methods on cell health. *Anal. Chem.*,  
245           **89**, 4663–4670 (2017).
- 246    9.    **Gift, E.A., Park, H.J., Paradis, G.A., Demain, A.L., and Weaver, J.C.:** : FACS-based  
247           isolation of slowly growing cells: double encapsulation of yeast in gel microdrops. *Nat.*  
248           *Biotechnol.*, **14**, 884–887 (1996).
- 249    10.   **Richardson, G.M., Lannigan, J., and Macara, I.G.:** : Does facs perturb gene  
250           expression? *Cytom. Part A*, **87**, 166–175 (2015).
- 251    11.   **Llufrio, E.M., Wang, L., Naser, F.J., and Patti, G.J.:** : Sorting cells alters their redox  
252           state and cellular metabolome. *Redox Biol.*, **16**, 381–387 (2018).
- 253    12.   **Li, M., van Zee, M., Riche, C.T., Tofig, B., Gallaher, S.D., Merchant, S.S.,**  
254           **Damoiseaux, R., Goda, K., and Di Carlo, D.:** : A gelatin microdroplet platform for  
255           high-throughput sorting of hyperproducing single-cell-derived microalgal clones. *Small*,  
256           **14**, 1–9 (2018).
- 257    13.   **Ma, C., Tan, Z.L., Lin, Y., Han, S., Xing, X., and Zhang, C.:** : Gel microdroplet–  
258           based high-throughput screening for directed evolution of xylanase-producing pichia  
259           pastoris. *J. Biosci. Bioeng.*, (2019).
- 260    14.   **Mao, A.S., Shin, J.W., Utech, S., Wang, H., Uzun, O., Li, W., Cooper, M., Hu, Y.,**  
261           **Zhang, L., Weitz, D.A., and Mooney, D.J.:** : Deterministic encapsulation of single  
262           cells in thin tunable microgels for niche modelling and therapeutic delivery. *Nat. Mater.*,  
263           **16**, 236–243 (2017).
- 264    15.   **Ota, Y., Saito, K., Takagi, T., Matsukura, S., Morita, M., Tsuneda, S., and Noda,**

265            **N.:** : Fluorescent nucleic acid probe in droplets for bacterial sorting (fnap-sort) as a high-  
266            throughput screening method for environmental bacteria with various growth rates.  
267            PLoS One, **14**, (2019).  
268    16.    **Weaver, J.C., McGrath, P., and Adams, S.:** : Gel microdrop technology for rapid  
269            isolation of rare and high producer cells. Nat. Med., **3**, 583–584 (1997).  
270  
271

272 **Figure legends**

273 **Figure 1** (A) Schematic illustration of the high-throughput screening workflow for high protein  
274 producing yeast cells. (B) Plasmid map of a plasmid producing mLuc with gal1 promoter used in  
275 this study. (C) Comparison of GMD formation method: Conventional membrane filtration method  
276 (upper row) and microfluidic droplet method (lower row). Left column shows dot plots of forward  
277 scatter (FSC) and side scatter (SSC) of GMDs analyzed by the microfluidic cell sorter. Right  
278 column shows microscope images of GMDs.

279

280 **Figure 2** (A) An example dot plot of FL2 against FL3 (peak height, H) for sorting of GMDs. (B)  
281 Microscope images of sorted GMDs from P7 segment: Differential interference contrast (left) and  
282 green fluorescence (right). Red circle indicates dead cell(s). (C) Microscope images of sorted  
283 GMDs from P8 segment. Dotted line shows border of GMD.

284

285

286 **Figure 3** Relative abundance of protein production based on the luciferase assay of high  
287 producing cells. Cells sorted from P8 area were compared with original cells. Error bars show  
288 standard deviation ( $n = 3$ , technical triplicates).

289

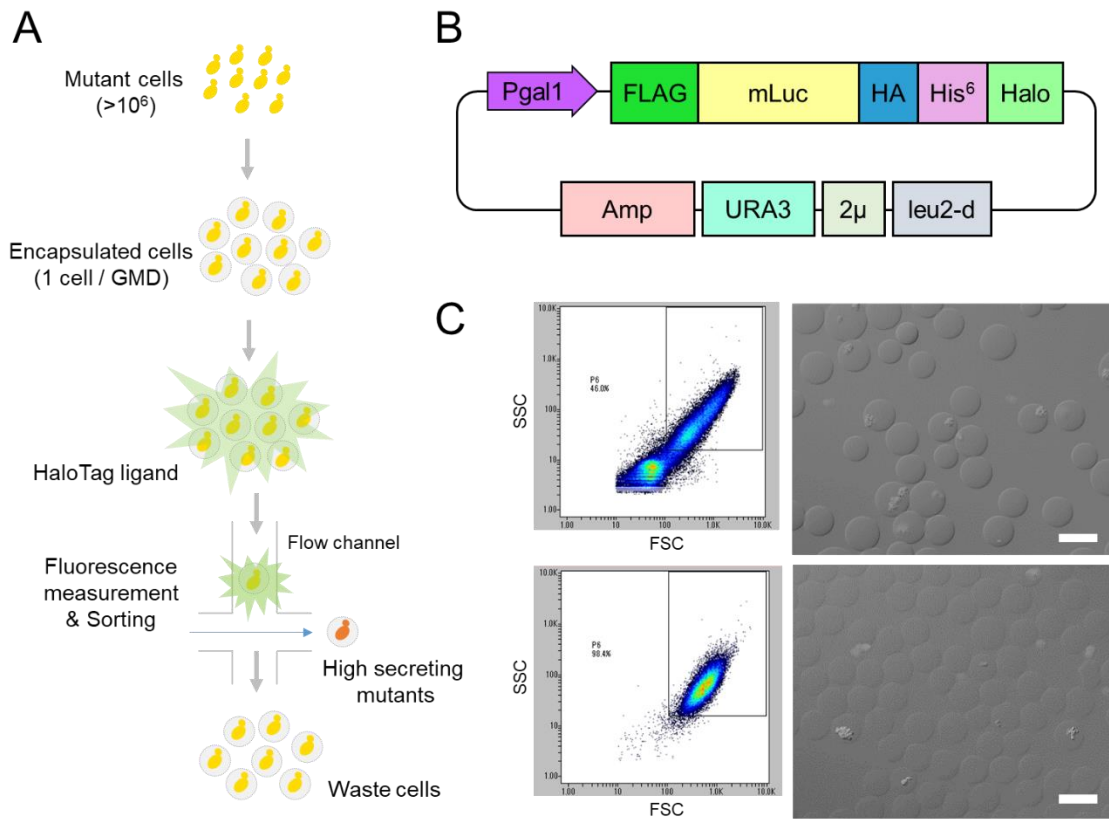

**Figure 1**

290

291

292

293

294

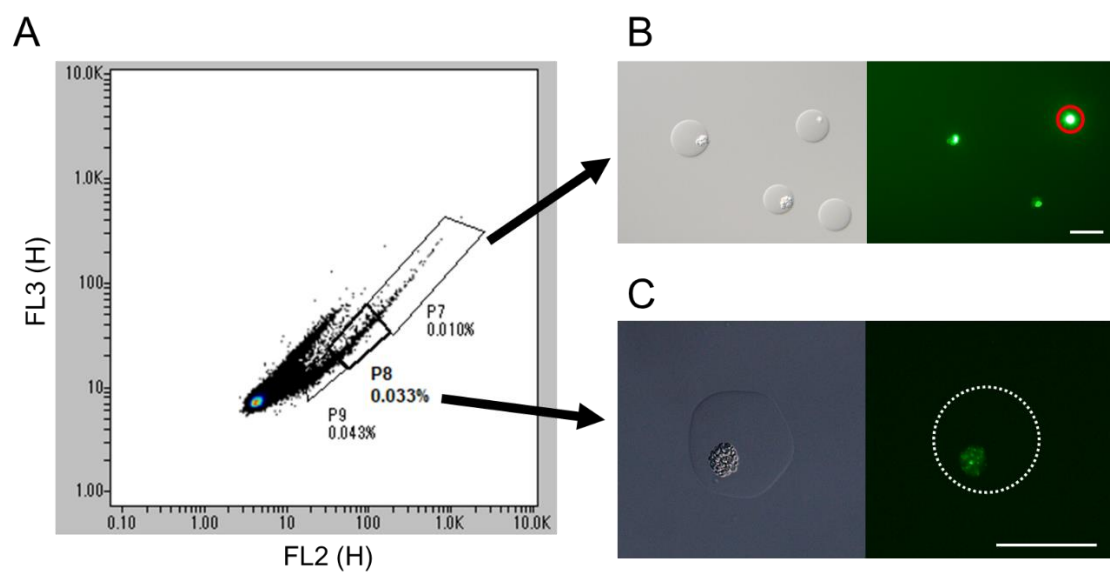

295

296

297

**Figure 2**

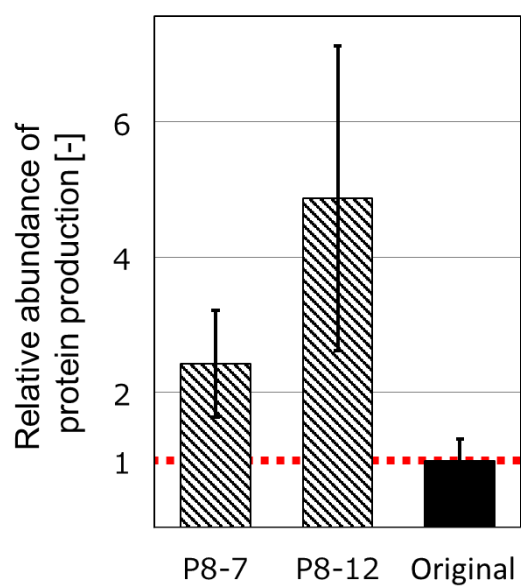

298

299

300

301

302

303

**Figure 3**
